# Supplementary material for: Screening of inhibitors for oxidase mimics of Au@Pt nanorods by catalytic oxidation of OPD
Source: Royal Society of Chemistry journal article supplement (doi:10.1039/c1cc14346h), 2011-01-01
Supplement: c1cc14346h.pdf [file c1cc14346h.pdf]

## Screening of inhibitors for oxidase mimics of Au@Pt NRs by catalytic oxidation of OPD

### Electronic Supplementary Information

#### Experimental section

**Chemicals and reagents.** Sodium borohydride ( $\text{NaBH}_4$ ), chlorauric acid ( $\text{HAuCl}_4 \cdot 3\text{H}_2\text{O}$ ), cetyltrimethylammonium bromide (CTAB), potassium tetrachloroplatinate(II) ( $\text{K}_2\text{PtCl}_6$ ), silver nitrate ( $\text{AgNO}_3$ ), Poly-(sodium 4-styrenesulfonate) (PSS), poly(diallyldimethyl ammoniumchloride) (PDDAC) and L-ascorbic acid (AA) were all purchased from Alfa Aesar and used as received. 30%  $\text{H}_2\text{O}_2$ , o-phenylenediamine (OPD), 3,3',5,5'-tetramethylbenzidine (TMB), and 2,2'-azino-bis(3-ethylbenzthiazoline-6-sulfonic acid) diammonium salt (ABTS) were from Sigma-Aldrich (Milwaukee, WI). Other reagents and chemicals were at least analytical reagent grade and purchased from Beijing Chemical Reagent Company (Beijing, China). Milli-Q water (18  $\text{M}\Omega \text{ cm}$ ) was used for all solution preparations.

**Synthesis of Au nanorods (NRs).** Au NRs were synthesized by using a seed-mediated growth procedure.<sup>7</sup> CTAB-capped Au seeds were synthesized by chemical reduction of  $\text{HAuCl}_4$  with  $\text{NaBH}_4$ : CTAB (7.5 mL, 0.1 M) was mixed with  $\text{HAuCl}_4$  (100  $\mu\text{L}$ , 24 mM), diluted with water to 9.4 mL, and stirred with a magnetic stirrer. Then, ice-cold  $\text{NaBH}_4$  (0.6 mL, 0.01 M) was added. The solution color immediately turned from bright yellow to brown, indicating the formation of seeds. The Au seeds were used within 2–5 h. 120  $\mu\text{L}$  seed solution was added to the growth solution consisted of CTAB (100 mL, 0.1 M),  $\text{HAuCl}_4$  (2.04 mL, 24 mM),  $\text{AgNO}_3$  (1.05 mL, 10 mM), and AA (552  $\mu\text{L}$ , 0.1 M) to initiate the growth of Au NRs. After 12 hours, AA (55.2  $\mu\text{L}$ , 0.1 M) was added under stirring twice with 40 min interval. The reaction mixture was reacted for 24 h. Au NRs were purified by centrifuging the solution at 12000 rpm for 5 min twice. The precipitate was collected and redispersed in deionized water, and the volume was reduced to 50 mL.

**Synthesis of Au@Pt NRs.**<sup>8</sup> Au NR solution (1 mL) was mixed with 75  $\mu\text{L}$  of 2 mM  $\text{PtCl}_4^{2-}$  aqueous solution. Then, 15  $\mu\text{L}$  0.1 M of AA was added and the total solution volume was diluted to 2 mL. The mixture was shaken vigorously and then placed in a 30°C water bath for 30 min. Within several minutes, the color of the solution changed from pink-red to dark gray, suggesting the formation of a Pt shell. Then 1 mL of 0.1 M CTAB was added.

**Modification of the Au@Pt NRs with PSS.** CTAB-coated nanorod solution (1 mL, Au@Pt NRs) was centrifuged at 12000 rpm for 10 min, and the precipitate was dispersed in 0.5 mL PSS aqueous solution (2  $\text{mg mL}^{-1}$  containing 6 mM NaCl). Then the solution was stirred magnetically for 3 h. After that, it was centrifuged at 12000 rpm for 10 min, and the precipitate was redispersed in water.

**Characterization.** The UV-vis-NIR absorption spectra were obtained from Varian Cary 50. Transmission electron microscopy (TEM) images were captured on a FEI TECNAI G2 F20 U-TWIN at an accelerating voltage of 200 kV.

**Catalytic Oxidation of OPD in the absence and presence of inhibitors.** 10  $\mu\text{L}$  aliquot of OPD (0.1 M) with or without inhibitors was diluted by 3 mL of 0.1 M pH 4.5 PBS buffer. Then, 50  $\mu\text{L}$  of PSS-coated NRs (5 nM) was added into the solution. UV-vis-NIR spectra were recorded after the addition

of NRs at different times. The reaction temperature was kept at 37 °C.

**Measurements of inhibition parameters.** For irreversible inhibitors,  $k_{obs}/[I]$  is used to characterize inhibition degree.  $k_{obs}$  is the observed pseudo-first order rate of inactivation (determined as the negative slope of a plot of  $\ln(v_t/v_0)$  versus time) and  $[I]$  is the concentration of inhibitor.

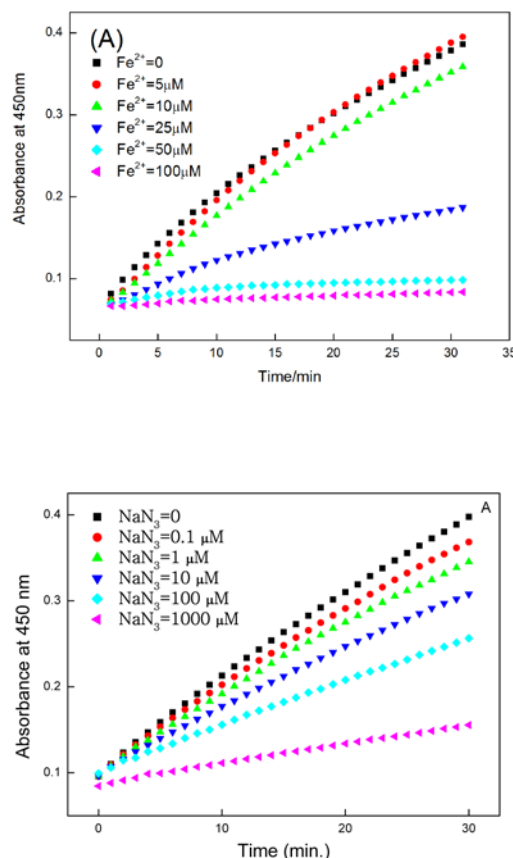

**Fig. S1** Inhibition kinetics of Au@Pt NRs by  $\text{Fe}^{2+}$ : (A)  $A_{450\text{nm}}$  vs. time, (B)  $\ln(v_t/v_0)$  vs time, and (C)  $k_{obs}$  vs concentration of  $\text{Fe}^{2+}$ . Reaction conditions: 0.33 mM OPD, 0.083 nM Au@Pt NRs at 37 °C 0.1 M pH 4.5 PBS buffer.

For reversible inhibition, the inhibitor ( $I$ ) binds to E and ES with the dissociation constants of  $K_i$  and  $K_i'$ , respectively. In the presence of inhibitor, each inhibitor concentration gives different values of apparent maximal velocity ( $V_{maxapp}$ ) and apparent Michaelis-Menten constant ( $K_{appm}$ ). In the plot of  $1/V_{maxapp}$  vs inhibitor concentration, the intercept on the inhibitor concentration axis gives  $K_i'$ . In the plot of  $K_{appm}/V_{maxapp}$  vs inhibitor concentration, the intercept on the concentration axis gives  $K_i$ .

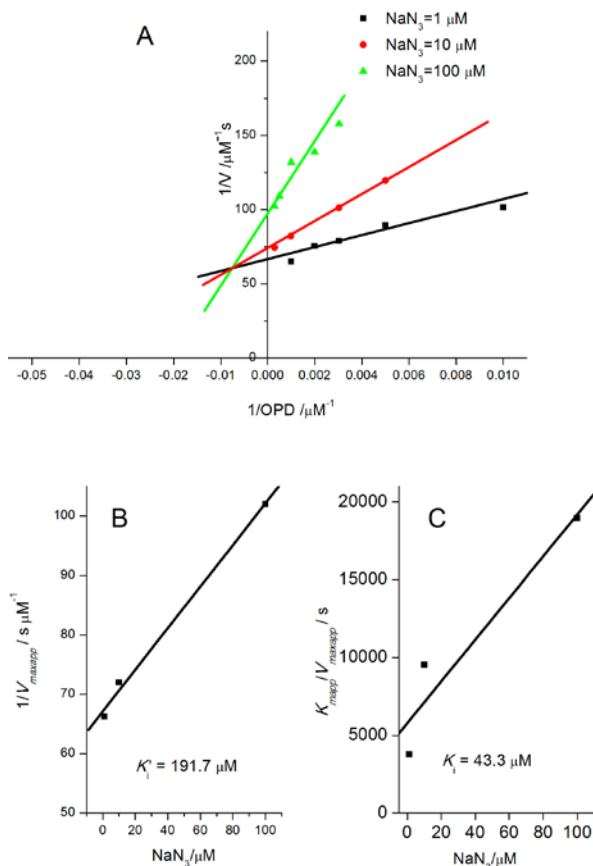

**Fig. S2** Lineweaver-Burk plots in the presence of different concentrations of  $\text{NaN}_3$  (A) and plots of  $1/V_{maxapp}$  vs  $\text{NaN}_3$  (B) and  $K_{appm}/V_{maxapp}$  vs  $\text{NaN}_3$  (C). Reaction conditions: 0.017 nM Au@Pt NRs at different concentrations of OPD at 37 °C 0.1 M pH 4.5 PBS buffer.

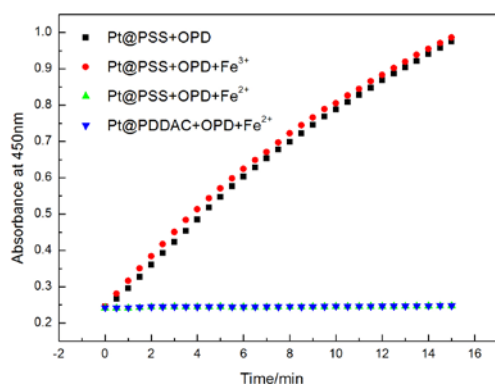

**Fig.S3** Kinetics of OPD oxidation by Au@Pt NRs without or with inhibition. Reaction conditions: 0.33 mM OPD, 100  $\mu\text{M}$   $\text{Fe}^{2+}$  or  $\text{Fe}^{3+}$  with 0.083 nM Au@Pt NRs at 37 °C 0.1M pH 4.5 PBS buffer.

**Screening of metal ions as inhibitors and detection of  $\text{Hg}^{2+}$  ions.** 10  $\mu\text{L}$  aliquot of OPD (0.1 M) and metal ions were diluted by 3 mL of 0.1 M PBS (pH = 4.5). Then, 50  $\mu\text{L}$  of PSS-coated NRs (5 nM) were added into the solution. UV-vis-

NIR spectra were recorded 30 min later after the addition of 20 NRs. The reaction temperature was kept at 37 °C. For the detection of  $\text{Hg}^{2+}$  ions, reactions were terminated by adding stop solution (100  $\mu\text{L}$  10 M  $\text{H}_2\text{SO}_4$ ).

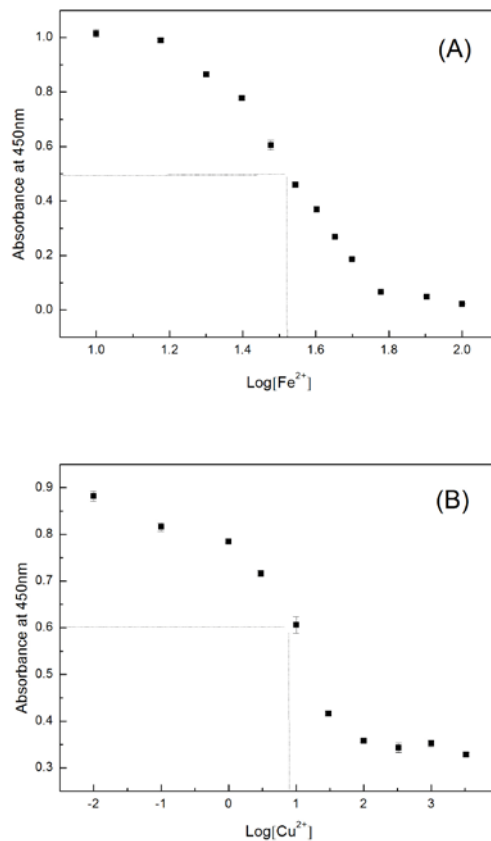

**Fig. S4** Inhibitory effects of A)  $\text{Fe}^{2+}$  and B)  $\text{Cu}^{2+}$  on the activity of Au@Pt NRs.

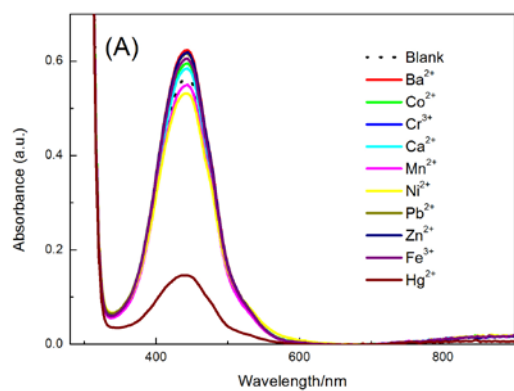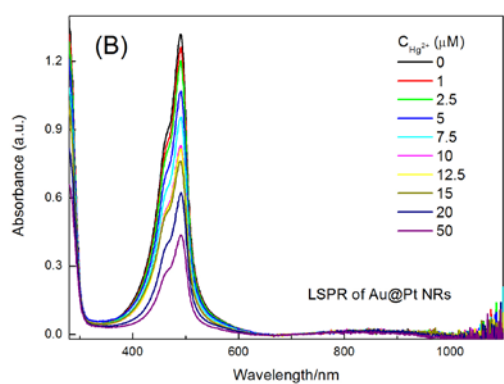

Fig. S5 Effects of (A) metal ions (100  $\mu\text{M}$ ) and (B)  $\text{Hg}^{2+}$  ions under different concentrations on the oxidase-like activity of Au@Pt NRs. Other reaction parameters:  $[\text{OPD}] = 0.33 \text{ mM}$ ,  $[\text{Au@Pt NRs}] = 0.083 \text{ nM}$  at  $37 \text{ }^\circ\text{C}$  in  $0.1 \text{ M pH} = 4.5 \text{ PBS}$  buffer for 30 min.
